1 **Targeted mutation detection in breast cancer using MammaSeq™**

2 **Authors:** Nicholas G. Smith<sup>1</sup>, Rekha Gyanchandani<sup>1</sup>, Grzegorz Gurda<sup>2</sup>, Peter C.  
3 Lucas<sup>3</sup>, Ryan J. Hartmaier<sup>1</sup>, Adam M. Brufsky<sup>4</sup>, Shannon Puhalla<sup>4</sup>, Amir Bahreini<sup>5</sup>,  
4 Karthik Kota<sup>4</sup>, Abigail I. Wald<sup>3</sup>, Yuri E. Nikiforov<sup>3</sup>, Marina N. Nikiforova<sup>3</sup>, Steffi  
5 Oesterrich<sup>1</sup>, Adrian V. Lee<sup>1</sup>

6 **Affiliations:**

7 <sup>1</sup>Department of Pharmacology and Chemical Biology, and Human Genetics, UPMC  
8 Hillman Cancer Center, Magee-Womens Research Institute, University of Pittsburgh,  
9 Pittsburgh, PA

10 <sup>2</sup>Gundersen Health System, La Crosse, WI

11 <sup>3</sup>Department of Pathology, University of Pittsburgh, Pittsburgh, PA

12 <sup>4</sup>Department of Medicine, University of Pittsburgh, Pittsburgh, PA

13 <sup>5</sup>Department of Genetics and Molecular Biology, School of Medicine, Isfahan  
14 University of Medical Sciences, Isfahan, Iran

15

16 **Corresponding author:**

17 Adrian V. Lee, Ph.D.

18 UPMC Hillman Cancer Center

19 Department of Pharmacology and Chemical Biology

20 Magee-Womens Research Institute

21 204 Craft Avenue

22 Pittsburgh, PA 15213

23 [leeav@upmc.edu](mailto:leeav@upmc.edu)

24 **Abstract:**

25 **Background:** Breast cancer is the most common invasive cancer among women  
26 worldwide. Next-generation sequencing (NGS) has revolutionized the study of cancer  
27 across research labs around the globe, however genomic testing in clinical settings  
28 remain limited. Advances in sequencing reliability, pipeline analysis, accumulation of  
29 relevant data, and the reduction of costs are rapidly increasing the feasibility of NGS-  
30 based clinical decision making.

31 **Methods:** We report the development of MammaSeq, a breast cancer specific NGS  
32 panel, targeting 79 genes and 1369 mutations, optimized for use in primary and  
33 metastatic breast cancer. To validate the panel, 46 solid tumor and 14 plasma  
34 circulating-free cfDNA samples were sequenced to a mean depth of 2311X and 1820  
35 X respectively. Variants were called using Ion Torrent Suite 4.0 and annotated with  
36 cravat CHASM. CNVKit was used to call copy number variants in the solid tumor  
37 cohort. The oncoKB Precision Oncology Database was used to identify clinically  
38 actionable variants. ddPCR was used to validate select cfDNA mutations.

39 **Results:** In cohorts of 46 solid tumors and 14 cfDNA samples from patients with  
40 advanced breast cancer we identified 592 and 43 protein coding mutations.  
41 Mutations per sample in the solid tumor cohort ranged from 1 to 128 (median 3) and  
42 the cfDNA cohort ranged from 0 to 26 (median 2.5). Copy number analysis in the solid  
43 tumor cohort identified 46 amplifications and 35 deletions. We identified 26 clinically  
44 actionable variants (levels 1-3) annotated by OncoKB, distributed across 20 out of 46

45 cases (40%), in the solid tumor cohort. Allele frequencies of ESR1 and FOXA1  
46 mutations correlated with CA.27.29 levels in patient matched blood draws.

47 **Conclusions:** In solid tumors biopsies and cfDNA, MammaSeq detects clinically  
48 actionable mutations (oncoKB levels 1-3) in 22/46 (48%) solid tumors and in 4/14  
49 (29%) of cfDNA samples. MammaSeq is a targeted panel suitable for clinically  
50 actionable mutation detection in breast cancer.

51 **Keywords:** Breast Cancer – Targeted Sequencing – cfDNA – Clinical Utility – tumor  
52 burden

## 53 **Background**

54 Advanced breast cancer is currently incurable. Selection of systematic therapies is  
55 primarily based on clinical and histological features and molecular subtype, as  
56 defined by clinical assays [1]. Large-scale genomic studies have shed light into the  
57 heterogeneity of breast cancer and its evolution to advanced disease [2, 3], and  
58 coupled with the rapid advancement of targeted therapies, highlights the need for  
59 more sophisticated diagnostics in cancer management [4].

60 Next-generation sequencing (NGS) based diagnostics allow clinicians to identify  
61 specific putative driver events in individual tumors. Correctly identifying disease  
62 drivers may enable clinicians to better predict treatment responses, and significantly  
63 improve patient care [5]. However, to date, the use of NGS as a clinical diagnostic  
64 remains limited [6]. Published data regarding prognostic utility, and utilization for  
65 selection of targeted therapies or enrolment clinical trials is lacking.

66 The original 46 gene AmpliSeq Cancer Hotspot Panel (Thermo Fisher Scientific) was  
67 shown to have a diagnostic suitability in primary lung, colon, and pancreatic cancers  
68 [7], however, our previous report that surveyed the clinical usefulness of the 50 gene  
69 AmpliSeq Cancer Hotspot Panel V2 in breast cancer found that the panel lacks  
70 numerous key known drivers of advanced breast cancer [8]. For example, the panel  
71 does not include any amplicons in *ESR1*, which harbor mutations which are known to  
72 contribute to hormone therapy resistance (for review see [9]), and lacks coverage of  
73 the majority of known driver mutations in *ERBB2* [10].

74 The lack of any reported breast cancer specific diagnostic NGS test inspired the  
75 development of MammaSeq™, an amplicon based NGS panel built specifically for use  
76 in advanced breast cancer. 46 solid tumor samples from women with advanced breast  
77 cancer, plus an additional 14 samples of circulating-free DNA (cfDNA) from patients  
78 with metastatic breast cancer were used in this pilot study to define the clinical utility  
79 of the panel. The patient cohort encompassed all 3 major molecular subtypes of breast  
80 cancer (luminal, ERBB2 positive and triple negative), and both lobular and ductal  
81 carcinomas (Table 1).

## 82 **Methods:**

### 83 **Patient Sample Collection**

84 For MammaSeq NGS testing, this study utilized breast tumors from 46 patients and  
85 blood samples from 7 patients. The research was performed under the University of  
86 Pittsburgh IRB approved protocol PRO16030066. The general patient characteristics  
87 are shown in Table 1 and more detailed patient information is shown in Supplemental  
88 Table 1. We utilized 46 of the 48 breast cancer cases previously described in a report  
89 by Gurda et al [8]. All of these cases underwent AmpliSeq Cancer Hotspot Panel v2  
90 NGS testing between January 1, 2013 and March 31, 2015 within the UPMC health  
91 system. MammaSeq™ was performed on the identical genomic DNA isolated from  
92 these tumor specimens that was originally used for initial clinical testing. 2 cases were  
93 excluded due to insufficient DNA. In addition, a cohort of 7 patients with metastatic  
94 breast cancer (MBC) had 20ml venous blood drawn in Streck Cell-Free DNA tubes  
95 between July 1, 2014 and March 29, 2016. All patients signed informed consent, and  
96 samples were acquired under the University of Pittsburgh IRB approved protocol  
97 (IRB0502025). We previously reported on the detection of ESR1 mutations in cfDNA  
98 from these 7 patients using ddPCR [11]. Serial blood draws (range; 2-5) were  
99 available for 4 patients. A total of 14 blood samples from 7 patients were utilized for  
100 cfDNA and buffy coat DNA isolation, followed by NGS testing.

### 101 **Patient Sample Processing**

102 cfDNA was isolated as described previously [11]. Blood was processed to separate  
103 plasma and buffy coat by double centrifugation within 4 days of blood collection. 1ml  
104 to 4ml of plasma was used for isolation of cfDNA using QIAamp Circulating Nucleic  
105 Acid kit (Qiagen). cfDNA was quantified using Qubit dsDNA HS assay kit  
106 (ThermoFisher Scientific). Genomic DNA was isolated from buffy coat using DNeasy  
107 Blood & Tissue Kit (Qiagen) for use as germline DNA control. Buffy coat DNA was  
108 quantified using Qubit dsDNA BR assay kit (ThermoFisher Scientific).

### 109 **Ion Torrent Sequencing**

110 20ng of DNA (10ng per amplicon pool) was used for library preparation using Ion  
111 AmpliSeq™ Library Kit 2.0 (Thermo Fisher Scientific) and the custom designed  
112 MammaSeq™ primer panel (Supplementary Data File 1). Template preparation by  
113 emulsion PCR and enrichment was performed on the Ion OneTouch 2 system  
114 (ThermoFisher Scientific). Template positive Ion Sphere particles (ISP) were loaded  
115 onto Ion chips and sequenced. Tumor DNA and cfDNA samples were sequenced using  
116 P1 chips (60 million reads) on the Ion Proton™ (ThermoFisher Scientific) at  
117 empirical depths of 1000x and 5000x respectively. Buffy coat DNA was sequenced  
118 using 318 chip (6 million reads) on the Ion Torrent Personal Genome Machine  
119 (PGM™) (ThermoFisher Scientific) at 500x.

### 120 **Variant Calling**

121 Ion Torrent Suite V4.0 was used to align raw fastq files to the hg19 reference genome  
122 and generate VCF files (4.0% AF cutoff for tumor samples, 1.0% AF cutoff for cfDNA

123 samples). Cravat CHASM-v4.3 (<http://hg19.cravat.us/CRAVAT/>) was used to  
124 annotate variants with resulting protein changes and snp annotation from ExAC [12]  
125 and 1000Genomes [13]. Variant calls from buffy coat DNA were used to remove  
126 germline variants from the 14 cfDNA samples in a patient matched manner. SNP and  
127 sequencing artifact filtering, data organization, and figure preparation were  
128 performed in R (v3.4.2). The R package ComplexHeatmaps was used to generate  
129 figures 1 and 3A [14]. CNVKit was used to call copy number across all genes, however  
130 only genes containing more than 3 amplicons were reported (Table 2) [15]. DNA from  
131 the buffy coat of the cfDNA cohort was used to generate a single copy-number  
132 reference which was used as a baseline for copy number calling on the solid tumor  
133 cohort. CNKit reports copy number as a log<sub>2</sub> ratio change. CNV were considered  
134 significant above an absolute copy number above 6 (  $\log_2(6/2)=1.58$ ) or below 1  
135 ( $\log_2(1/2) = -1$ ).

## 136 **Data and code**

137 Annotated, unfiltered, mutation and CNV data, along with R code related to this study,  
138 are deposited on GitHub. (<https://github.com/smithng1215>)

## 139 **ddPCR**

140 2 ng of cfDNA or buffy coat DNA was subjected to targeted high-fidelity  
141 preamplification for 15 cycles using custom designed primers (Supplemental Table  
142 2) and PCR conditions previously described [11]. Targeted preamplification products  
143 were purified using QIAquick PCR Purification kit (Qiagen) and diluted at 1:20 before



144 use in ddPCR reaction. 1.5ul of diluted preamplified DNA was used as input for ddPCR  
145 reaction. ddPCR was performed for ESR1-D538G, FOXA1-Y175C, and PIK3CA-  
146 H1047R mutations. Custom ddPCR assays were developed for ESR1-D538G  
147 (Integrated DNA Technologies) and FOXA1-Y175C (ThermoFisher Scientific).  
148 Sequences are described in Supplementary Table 3 . PIK3CA-H1047R was analyzed  
149 using PrimePCR ddPCR assay (Bio-Rad Laboratories) dHsaCP2000078 (PIK3CA)/  
150 dHsaCP2000077 (H1047R). Nuclease-free water and buffy coat-derived wildtype  
151 genomic DNA as negative controls, and oligonucleotides carrying mutation of interest  
152 or DNA from a cell line with mutation as positive controls were included in each run  
153 to eliminate potential false positive mutant signals. An allele frequency of 0.1% was  
154 used as a lower limit of detection.

## 155 **Statistical Analysis**

156 All statistical analysis was performed in R 3.4.2. To determine if there was a  
157 significant correlation between mutational burden and copy number burden, we  
158 calculated the pearson correlation coefficient between the number of somatic  
159 mutations in each sample, with the number of significant copy number changes in  
160 each sample.

## 161 **Results**

### 162 **Development of MammaSeq™ Panel**

163 To build a comprehensive list of somatic mutations in breast cancer, we combined  
164 mutation calls from primary tumors in TCGA (curated list level 2.1.0.0) and limited  
165 studies focused on metastatic breast cancer [16-18]. The biological function and  
166 druggability of mutated genes were investigated via Gene Ontology (GO) [19] and  
167 DGIdb (v2.0) databases [20]. The information regarding FDA approved drugs was  
168 downloaded from “<https://www.fda.gov/Drugs>” and added to our list. We used the  
169 following criteria to prioritize the clinically important mutated genes:

- 170 • The mutated gene is among significantly mutated genes (SMGs) in primary  
171 and metastatic samples.
- 172 • The mutated gene is clinically actionable (e.g. there is available FDA-approved  
173 drug(s) against it).
- 174 • The mutated gene is of functional importance in cancer (e.g. kinase genes  
175 were scored higher in the list).
- 176 • The mutation has been found in more than 5 primary tumors OR 2 metastatic  
177 tumors.
- 178 • The mutation has been found in both primary and metastatic lesions.

179 The final mutation list was then curated and narrowed down to 80 genes and 1398  
180 mutations. Additional amplicons were added to select genes to ensure sufficient  
181 coverage of genes known to harbor functional copy-number variants. Amplicon probe

182 design was unsuccessful for 29 mutations, including all 3 mutations in the gene HLA-  
183 A, yielding a final panel consisting of 688 amplicons targeting 1369 mutations across  
184 79 genes. (Selected genes described in Table 2. Gene coverage depicted in  
185 Supplemental Figure 1. Panel design described in supplemental data file 1).

186 The panel includes 34 of the 50 (68%) genes incorporated in AmpliSeq Cancer  
187 Hotspot Panel v2. Genes that were not mutated in breast cancer (TCGA and in-house  
188 data) and genes that were not considered to be clinically actionable were not  
189 included. The MammaSeq™ panel includes 8 of the 10 (80%) genes and ~ 91% of the  
190 hotspots targeted by the Thermo Oncomine Breast cfDNA assay. MammaSeq™ covers  
191 14% of the base pairs covered by the Qiagen Human Breast Cancer GeneRead DNaseq  
192 Targeted Array, however, it covers hotspots in over half of the genes (57%) (plus an  
193 additional 34 genes). Of these panels, MammaSeq is the only one that includes CDK4  
194 and CDK6, both of which can be targeted with FDA approved CDK4/6 inhibitors [21].  
195 Additional genes unique to MammaSeq include common drivers, CCND1, MTOR, and  
196 FGFR4. Finally, MammaSeq covers 68 of 315 genes targeted by the larger pan cancer  
197 Foundation Medicine, FoundationOne panel. Supplemental figure 2 details the  
198 overlap in coverage between MammaSeq™ and above mentioned commercially  
199 available panels.

## 200 **Characterization of Genetic Variants detected by Mammaseq in a Solid Tumor** 201 **Cohort**

202 To evaluate performance in mutation detection by the MammaSeq™ panel,  
203 sequencing was carried out on a cohort of 46 solid tumor samples, with a mean read

204 depth of 2311X (Supplemental Figure 3). 4970 total variants (mean: 106, median:  
205 82) were called across all patient samples. We removed identical genomic variants  
206 that were present in more than 10 samples as these were likely to be sequencing  
207 artifacts or common SNPs. Removing non-coding and synonymous variants yielded  
208 1433 and 901 variants, respectively. To filter out less common polymorphisms, we  
209 removed variants annotated in ExAC [12] or the 1000Genomes [13] databases in  
210 more than 1% of the population. We removed variants with an allele frequency above  
211 90% as these were likely germline. Finally, to focus on high confidence mutations, we  
212 removed variants with a strand bias outside of the range of 0.5-0.6, yielding a total of  
213 592 protein coding mutations (mean 12.9, median 3, IQR 3) (Figure 1).

214 Interestingly, as noted by the variation between the mean and median, the total  
215 number of mutations was skewed toward a subset of samples (Figure 1-top panel).  
216 408 of the 592 mutations (69%) were found in just 4 of the 46 samples (Supplemental  
217 Figure 4). These 4 samples are by definition outliers, as they are all more than 1.5  
218 times the IQR plus the median. 3 of these 4 samples with high mutational burden were  
219 of triple negative subtype, the fourth being ER<sup>+</sup>/HER2<sup>+</sup>. The most common mutated  
220 genes were TP53 (57%) and PIK3CA (43%). We also noted common mutations in  
221 ESR1 (21%), ATM (21%) and ERBB2 (17%).

222 To examine CNV changes, we established a baseline for pull down and amplification  
223 efficiency by performing MammaSeq™ on normal germline DNA from 14 samples (7  
224 patients – 6 additional). CNVkit [15] was used to pool the normal samples into single  
225 reference and then call CNV in the solid tumor cohort (Figure 1). CNV were identified

226 in many common oncogenes including *CCND1*, *MYC*, *FGFR1* and others. 2 of the 3  
227 *ERBB2*<sup>+</sup> samples (via clinical assay) showed CNV by MammaSeq. FGF19 and *CCND1*  
228 were co-amplified in 9 of the 46 (20%) solid tumors. Both genes are located on 11q13,  
229 a band identified in GWA studies as harboring variants, including amplifications,  
230 associated with ER<sup>+</sup> breast cancers [22]. There wasn't a correlation between  
231 mutational burden and copy number burden (pearson correlation p-value = 0.7445).

### 232 **Clinical Utility of Genetic Variants Detected by MammaSeq**

233 To determine how many of the mutations have putative clinical utility, we utilized the  
234 OncoKB precision oncology knowledge database [23]. 25 of the genes in the  
235 MammaSeq<sup>TM</sup> panel (32% of the panel) harbor clinically actionable variants with  
236 supporting clinical evidence (OncoKB levels 1-3). In total, we identified 28 actionable  
237 variants (26 SNV and 2 *ERBB2* amplifications) that have supporting clinical evidence  
238 (level 1-3) and an additional 3 actionable variants supported by substantial research  
239 evidence (level 4) in the solid tumor cohort (Table 3). The 26 SNVs were distributed  
240 across 20 of the 46 cases (43%) (Figure 2). Consistent with the report detailing the  
241 development of the OncoKB database [24], the vast majority of actionable variants in  
242 breast cancer are annotated at level 3, indicating that variants have been used as  
243 biomarkers in Clinical Trials, however they are not FDA approved. In fact, the only  
244 level 1 annotated variant in breast cancer is *ERBB2* amplification.

### 245 **Characterization of Genetic Variants detected by Mammaseq in cfDNA**

246 To examine the potential of MammaSeq™ to detect variants in cfDNA, we sequenced  
247 14 cfDNA samples isolated from 7 patients with metastatic disease. cfDNA samples  
248 were sequenced to a mean depth of 1810X, while matched buffy gDNA was sequenced  
249 to a mean depth of 425X (Supplemental figure 4) .

250 We applied the same filtering pipeline to the cfDNA variants and solid tumor variants,  
251 except in the smaller cohort we removed all identical variants found in more than 4  
252 samples, and lowered the minimum allele frequency to 1.0%. We identified a total of  
253 43 somatic mutations across the 14 cfDNA samples (mean: 3.1, median 1, IQR 1.75)  
254 (Figure 3A). Similar to the solid tumor cohort, a single draw from 1 patient (CF\_28-  
255 Draw 1) harbored 25 of the 13 (58%) total mutations. Using the same definition, this  
256 sample is also an outlier. Similar to the solid tumor cohort, PIK3CA and ESR1 were  
257 among the most commonly mutated genes.

258 Two of the identified somatic mutations (each identified in 2 draws from 1 patient)  
259 are annotated at level 3 in the OncoKB database, ESR1 - D538G and PIK3CA - H1047R  
260 (Figure 3A). The ESR1 mutation was identified in 2 separate blood draws from patient  
261 CF\_28 taken 13 months apart. Interestingly, the FOXA1 – Y175C mutation was also  
262 identified in the same draws from patient CF\_28 (Figure 3B). The allele frequencies  
263 of these mutations strongly correlate with levels of cancer antigen 27-29 (CA-27.29),  
264 indicating that the mutation frequencies are likely an indicator of disease burden.  
265 Mutations identified in all three genes (ESR1, PIK3CA, and FOXA1) were  
266 independently validated using ddPCR (Supplemental Figure 5).

## 267 **Discussion**

268 Advances in the accuracy, cost, and analysis of NGS make it an ideal platform to  
269 develop diagnostics that can be used to precisely identify treatment options.  
270 MammaSeq was developed to comprehensively cover known driver mutation  
271 hotspots specifically in primary and metastasis breast cancer that would identify  
272 mutations with potential prognostic value. Typically, NGS diagnostics are reserved  
273 for late stage disease. As a result, (as noted in our previous publication[8]), the solid  
274 tumor cohort was significantly enriched for metastatic disease and markers of poor  
275 prognosis - triple negative subtype, late presentation, and therapy resistance.

276 Consistent with previous mutational studies, we report that a small subset of breast  
277 cancers harbor high mutational burden [25]. Across a variety of cancers, groups have  
278 demonstrated the correlation between the tumor mutation burden (TMB) and the  
279 efficacy of immunotherapy checkpoint inhibitors (reviewed here [26]). However, the  
280 ability to accurately depict tumor mutation burden is dependent on the percentage of  
281 the covered exome. Illumina have shown that the TruSight Tumor 170 panel (170  
282 genes and 0.524 Mb) begins to skew the TMB upwards, when used on samples that  
283 contain relatively few mutations [27]. A previous study by Chalmers et al. used a  
284 computational model to show that below 0.5Mb, TMB measurements are highly  
285 variable and unreliable [28]. The MammaSeq™ panel covers just 82,035bp (0.08Mb),  
286 and we speculate that it cannot be used to calculate a mutational burden comparable  
287 to whole exome based studies. That being said, the stark difference in the total

288 number of mutations identified in the subset of 4 tumor samples, suggests that they  
289 may be suited for immunotherapy.

290 Liquid biopsies are beginning to be utilized clinically after numerous proof-of-  
291 principle studies have demonstrated the potential of circulating cell-free DNA  
292 (cfDNA) for prognostication, molecular profiling, and monitoring disease burden [11,  
293 29-33]. We have demonstrated that the MammaSeq™ panel can be used to identify  
294 mutations in cfDNA. For one patient (CF\_28), we have cfDNA data from 5 blood draws  
295 taken over the course of 13 months. The sharp drop-off in the number of somatic  
296 mutations identified between the first and second draws co-occurs with a decrease in  
297 CA.27.29 levels, suggesting that the patient may have responded well to treatment,  
298 leading to disappearance of sensitive clones. In the later blood draws, we did not  
299 observe an increase in the total number of somatic mutations, however, we did find  
300 an increase in the allele frequency of ESR1-D538G and FOXA1-Y175C mutations,  
301 which may be caused by therapeutic selection of resistant clones.

302 High-throughput genotyping of solid tumors and continual monitoring of disease  
303 burden through sequencing of cfDNA represent potential clinical applications for NGS  
304 technologies. It should be noted that targeted DNA sequencing panels such as  
305 MammaSeq™ are far less comprehensive than whole exome sequencing and they do  
306 not allow for evaluation of structural variants, which can often lead to gene fusions  
307 that function as drivers [34]. Nevertheless, as a focused panels represent cost-  
308 effective and useful alternatives to whole exome sequencing for targeted mutation  
309 detection.



## 310 **Conclusions**

311 Here we report the development of MammaSeq™, a targeted sequencing panel  
312 designed based on current knowledge of the most common, impactful, and targetable  
313 drivers of metastatic breast cancer. This data provides further evidence for the use of  
314 NGS diagnostics in the management of advanced breast cancers.

## 315 **List of Abbreviations**

- 316 cfDNA: circulating-free cfDNA
- 317 CNV: Copy Number Variants
- 318 ddPCR: Droplet Digital PCR
- 319 dgIDB: Drug-Gene Interaction Database
- 320 gDNA: Genomic DNA
- 321 GO: Gene Ontology
- 322 GWAs: Genome Wide Association studies
- 323 IDC: Invasive Ductal Carcinoma
- 324 ILC: Invasive Lobular Carcinoma
- 325 ISP: Ion Sphere particles
- 326 MBC: Metastatic Breast Cancer
- 327 NGS: Next Generation Sequencing
- 328 PGM: Ion Torrent Personal Genome Machine
- 329 SMG: Significantly Mutated Gene
- 330 SNP: Single Nucleotide Polymorphism
- 331 SNV: Single Nucleotide Variant
- 332 TCGA: The Cancer Genome Atlas
- 333 TMB: Tumor Mutational Burden

334 **Declarations**

335 **Ethics approval and consent to participate**

336 The research was performed under the University of Pittsburgh IRB approved  
337 protocol PRO16030066.

338 **Consent for publication**

339 Not applicable.

340 **Availability of data and material**

341 Annotated, unfiltered, mutation and CNV data, along with R code related to this study,  
342 are deposited on GitHub (<https://github.com/smithng1215>).

343 **Competing Interests**

344 RJH received salary and has ownership interest (including patents) in Foundation  
345 Medicine and is currently an employee at AstraZeneca. Other authors declare that  
346 they have no conflict of interests to report.

347 **Funding**

348 Research funding for this project was provided in part by a Susan G. Komen Scholar  
349 award to AVL and to SO, the Breast Cancer Research Foundation (AVL and SO), the  
350 Fashion Footwear Association of New York (SO and AVL), and a research grant from  
351 Glimmer of Hope.

352 **Author Contributions**

353 RJH, AB and AVL designed the MammaSeq panel. NGS and RG analyzed data and wrote  
354 manuscript. AMB, SP, and KK collected samples. AIW, PCL, and GG performed sample  
355 processing, quality control, and sequencing. NGS, RG, and AVL analyzed data and  
356 wrote the manuscript. SO, YEN, and MNN provided critical feedback on panel design  
357 and manuscript writing. All authors read and approved the final manuscript.

358 **Acknowledgements**

359 We are thankful to the patients who generously provided tumor tissue for our studies  
360 and to the surgical, pathology, and tissue bank colleagues for their substantial  
361 assistance and support. This project used the University of Pittsburgh HSCRF  
362 Genomics Research Core, and the UPCI Tissue and Research Pathology Services that  
363 is supported in part by award P30CA047904. We thank Lousie Mazur and the UPMC  
364 Cancer Registry for clinical abstraction.

## 365 **Figure Legends**

366 **Fig 1: Genetic alterations identified by the MammaSeq™ gene panel in a test**  
367 **cohort of 46 breast cancers.** Oncoprint depicting the distribution of somatic  
368 mutations, copy-number amplifications (absolute copy-number greater than 6), and  
369 deletions (absolute copy-number less than 1).

370 **Fig 2: Clinical Actionability of MammaSeq™ identified somatic alterations. (A.)**  
371 Annotation levels, adapted from OncoKB[23] **(B.)** Samples were categorized based on  
372 the most actionable alteration. Specific alterations and associated drugs are depicted  
373 in Table 3.

374 **Fig 3: Genetic alterations identified in cfDNA from a test cohort of 7 patients**  
375 **with metastatic invasive ductal carcinoma. (A.)** Oncoprint of somatic mutations  
376 identified in 14 cfDNA samples. **(B.)** Clinical timeline and mutant allele frequency of  
377 ESR1-D538G and FOXA1-Y175C mutations in serial blood draws from patient CF28.  
378 The timeline starts with diagnosis of metastasis and shows tumor marker  
379 assessments (CA 27.29 antigen line graph), mutant allele frequency (bar graphs),  
380 LLoD (dotted line), blood draws (syringe), and treatments received. Treatment  
381 abbreviations: AI (aromatase inhibitor), SERD (selective estrogen receptor  
382 degrader), Ev. (Everolimus), Antimb. (Antimetabolite), Platin (Platinum-based  
383 chemotherapy).

384 **Supplemental Figure 1: MammaSeq™ gene coverage.** The percentage of protein  
385 coding bases pairs in each gene that is sequenced by the MammaSeq™ panel.

386 **Supplemental Figure 2:** Coverage overlap between MammaSeq™ and select  
387 commercially available panels used in breast cancer. Overlap of genes present in the  
388 MammaSeq™ panel and the **(A.)** Foundation Medicine FoundationOne panel **(B.)**  
389 Thermo Ion AmpliSeq Cancer Hotspot Panel (v2) **(C.)** Qiagen GeneRead Human  
390 Breast Cancer Panel and the **(D.)** Thermo Oncomine Breast cfDNA Assay. Overlap of  
391 the number of base pairs covered for the **(E.)** Qiagen GeneRead and **(F.)** Thermo  
392 Oncomine panels were calculated as these panel designs are publicly available.

393 **Supplemental Figure 3:** Mean sequencing read depth for **(A.)** the 46 solid tumor  
394 cohort. **(B.)** isolated mononuclear cells from the 14 cfDNA draws and **(C.)** the 14  
395 cfDNA samples.

396 **Supplemental Figure 4:** Tumor mutational burden across all samples in the 46 solid  
397 tumor cohort. **(A.)** Total detected mutations for each sample.

398 **Supplemental Figure 5:** ddPCR validation of mutations identified by MammaSeq™  
399 is indicated along with mutant allele frequencies for **(A.)** ESR1-D538G, **(B.)** FOXA1-  
400 Y175C, and **(C.)** PIK3CA-H1047R.

401 **References:**

- 402 1. Harbeck, N., C. Thomssen, and M. Gnant, *St. Gallen 2013: brief preliminary*  
403 *summary of the consensus discussion*. Breast Care (Basel), 2013. **8**(2): p. 102-  
404 9.
- 405 2. Koren, S. and M. Bentires-Alj, *Breast Tumor Heterogeneity: Source of Fitness,*  
406 *Hurdle for Therapy*. Mol Cell, 2015. **60**(4): p. 537-46.
- 407 3. Cancer Genome Atlas, N., *Comprehensive molecular portraits of human breast*  
408 *tumours*. Nature, 2012. **490**(7418): p. 61-70.
- 409 4. Hyman, D.M., B.S. Taylor, and J. Baselga, *Implementing Genome-Driven*  
410 *Oncology*. Cell, 2017. **168**(4): p. 584-599.
- 411 5. Kamps, R., et al., *Next-Generation Sequencing in Oncology: Genetic Diagnosis,*  
412 *Risk Prediction and Cancer Classification*. Int J Mol Sci, 2017. **18**(2).
- 413 6. Pezo, R.C., et al., *Impact of multi-gene mutational profiling on clinical trial*  
414 *outcomes in metastatic breast cancer*. Breast Cancer Res Treat, 2017.
- 415 7. Boland, M.G., et al., *Clinical next generation sequencing to identify actionable*  
416 *aberrations in phase I program*. Oncotarget, 2015. **6**(24).
- 417 8. Gurda, G.T., et al., *Characterizing Molecular Variants and Clinical Utilization of*  
418 *Next-generation Sequencing in Advanced Breast Cancer*. Appl  
419 Immunohistochem Mol Morphol, 2016. **00**(00).
- 420 9. Reinert, T., et al., *Clinical Implications of ESR1 Mutations in Hormone*  
421 *Receptor-Positive Advanced Breast Cancer*. Frontiers in Oncology, 2017.  
422 **7**(26).
- 423 10. Bose, R., et al., *Activating HER2 mutations in HER2 gene amplification negative*  
424 *breast cancer*. Cancer Discov, 2013. **3**(2): p. 224-37.
- 425 11. Wang, P., et al., *Sensitive Detection of Mono- and Polyclonal ESR1 Mutations in*  
426 *Primary Tumors, Metastatic Lesions, and Cell-Free DNA of Breast Cancer*  
427 *Patients*. Clin Cancer Res, 2016. **22**(5): p. 1130-7.
- 428 12. Lek, M., et al., *Analysis of protein-coding genetic variation in 60,706 humans*.  
429 Nature, 2016. **536**(7616): p. 285-91.
- 430 13. Genomes Project, C., et al., *A global reference for human genetic variation*.  
431 Nature, 2015. **526**(7571): p. 68-74.
- 432 14. Gu, Z., R. Eils, and M. Schlesner, *Complex heatmaps reveal patterns and*  
433 *correlations in multidimensional genomic data*. Bioinformatics, 2016. **32**(18):  
434 p. 2847-2849.
- 435 15. Talevich, E., et al., *CNVkit: Genome-Wide Copy Number Detection and*  
436 *Visualization from Targeted DNA Sequencing*. PLoS Comput Biol, 2016. **12**(4):  
437 p. e1004873.
- 438 16. Toy, W., et al., *ESR1 ligand-binding domain mutations in hormone-resistant*  
439 *breast cancer*. Nat Genet, 2013. **45**(12): p. 1439-45.
- 440 17. Robinson, D.R., et al., *Activating ESR1 mutations in hormone-resistant*  
441 *metastatic breast cancer*. Nat Genet, 2013. **45**(12): p. 1446-51.
- 442 18. Craig, D.W., et al., *Genome and transcriptome sequencing in prospective*  
443 *metastatic triple-negative breast cancer uncovers therapeutic vulnerabilities*.  
444 Mol Cancer Ther, 2013. **12**(1): p. 104-16.

- 445 19. Michael Ashburner, C.A.B., Judith A. Blake, David Botstein, Heather Butler<sup>1</sup>, J.  
446 Michael Cherry, Allan P. Davis, Kara Dolinski, Selina S. Dwight, Janan T. Eppig,  
447 Midori A. Harris, David P. Hill<sup>4</sup>, Laurie Issel-Tarver, Andrew Kasarskis,  
448 Suzanna Lewis, John C. Matese, Joel E. Richardson, Martin Ringwald, Gerald  
449 M. Rubin & Gavin Sherlock, *Gene Ontology: toll for the unification of biology*.  
450 Nature Genetics, 2000. **25**.
- 451 20. Wagner, A.H., et al., *DGIdb 2.0: mining clinically relevant drug-gene*  
452 *interactions*. Nucleic Acids Res, 2016. **44**(D1): p. D1036-44.
- 453 21. Bilgin, B., et al., *A current and comprehensive review of cyclin-dependent kinase*  
454 *inhibitors for the treatment of metastatic breast cancer*. Curr Med Res Opin,  
455 2017. **33**(9): p. 1559-1569.
- 456 22. Turnbull, C., et al., *Genome-wide association study identifies five new breast*  
457 *cancer susceptibility loci*. Nat Genet, 2010. **42**(6): p. 504-7.
- 458 23. Chakravarty, D., et al., *OncoKB: A Precision Oncology Knowledge Base*. JCO |  
459 Precision Oncology, 2017.
- 460 24. Zehir, A., et al., *Mutational landscape of metastatic cancer revealed from*  
461 *prospective clinical sequencing of 10,000 patients*. Nat Med, 2017. **23**(6): p.  
462 703-713.
- 463 25. Nik-Zainal, S., et al., *Landscape of somatic mutations in 560 breast cancer*  
464 *whole-genome sequences*. Nature, 2016. **534**(7605): p. 47-54.
- 465 26. Nishino, M., et al., *Monitoring immune-checkpoint blockade: response*  
466 *evaluation and biomarker development*. Nat Rev Clin Oncol, 2017. **14**(11): p.  
467 655-668.
- 468 27. *Analysis of Tumor Mutational Burden with TruSight Tumor 170*. Illumina.
- 469 28. Chalmers, Z.R., et al., *Analysis of 100,000 human cancer genomes reveals the*  
470 *landscape of tumor mutational burden*. Genome Med, 2017. **9**(1): p. 34.
- 471 29. Dawson, S.J., et al., *Analysis of circulating tumor DNA to monitor metastatic*  
472 *breast cancer*. N Engl J Med, 2013. **368**(13): p. 1199-209.
- 473 30. Bettegowda, C., et al., *Detection of circulating tumor DNA in early- and late-*  
474 *stage human malignancies*. Sci Transl Med, 2014. **6**(224): p. 224ra24.
- 475 31. Rothe, F., et al., *Plasma circulating tumor DNA as an alternative to metastatic*  
476 *biopsies for mutational analysis in breast cancer*. Ann Oncol, 2014. **25**(10): p.  
477 1959-65.
- 478 32. Garcia-Murillas, I., et al., *Mutation tracking in circulating tumor DNA predicts*  
479 *relapse in early breast cancer*. Sci Transl Med, 2015. **7**(302): p. 302ra133.
- 480 33. Gyanchandani, R., et al., *Detection of ESR1 mutations in circulating cell-free*  
481 *DNA from patients with metastatic breast cancer treated with palbociclib and*  
482 *letrozole*. Oncotarget, 2017. **8**(40): p. 66901-66911.
- 483 34. Hartmaier, R.J., et al., *Recurrent hyperactive ESR1 fusion proteins in endocrine*  
484 *therapy resistant breast cancer*. Ann Oncol, 2018.



# Figure 1

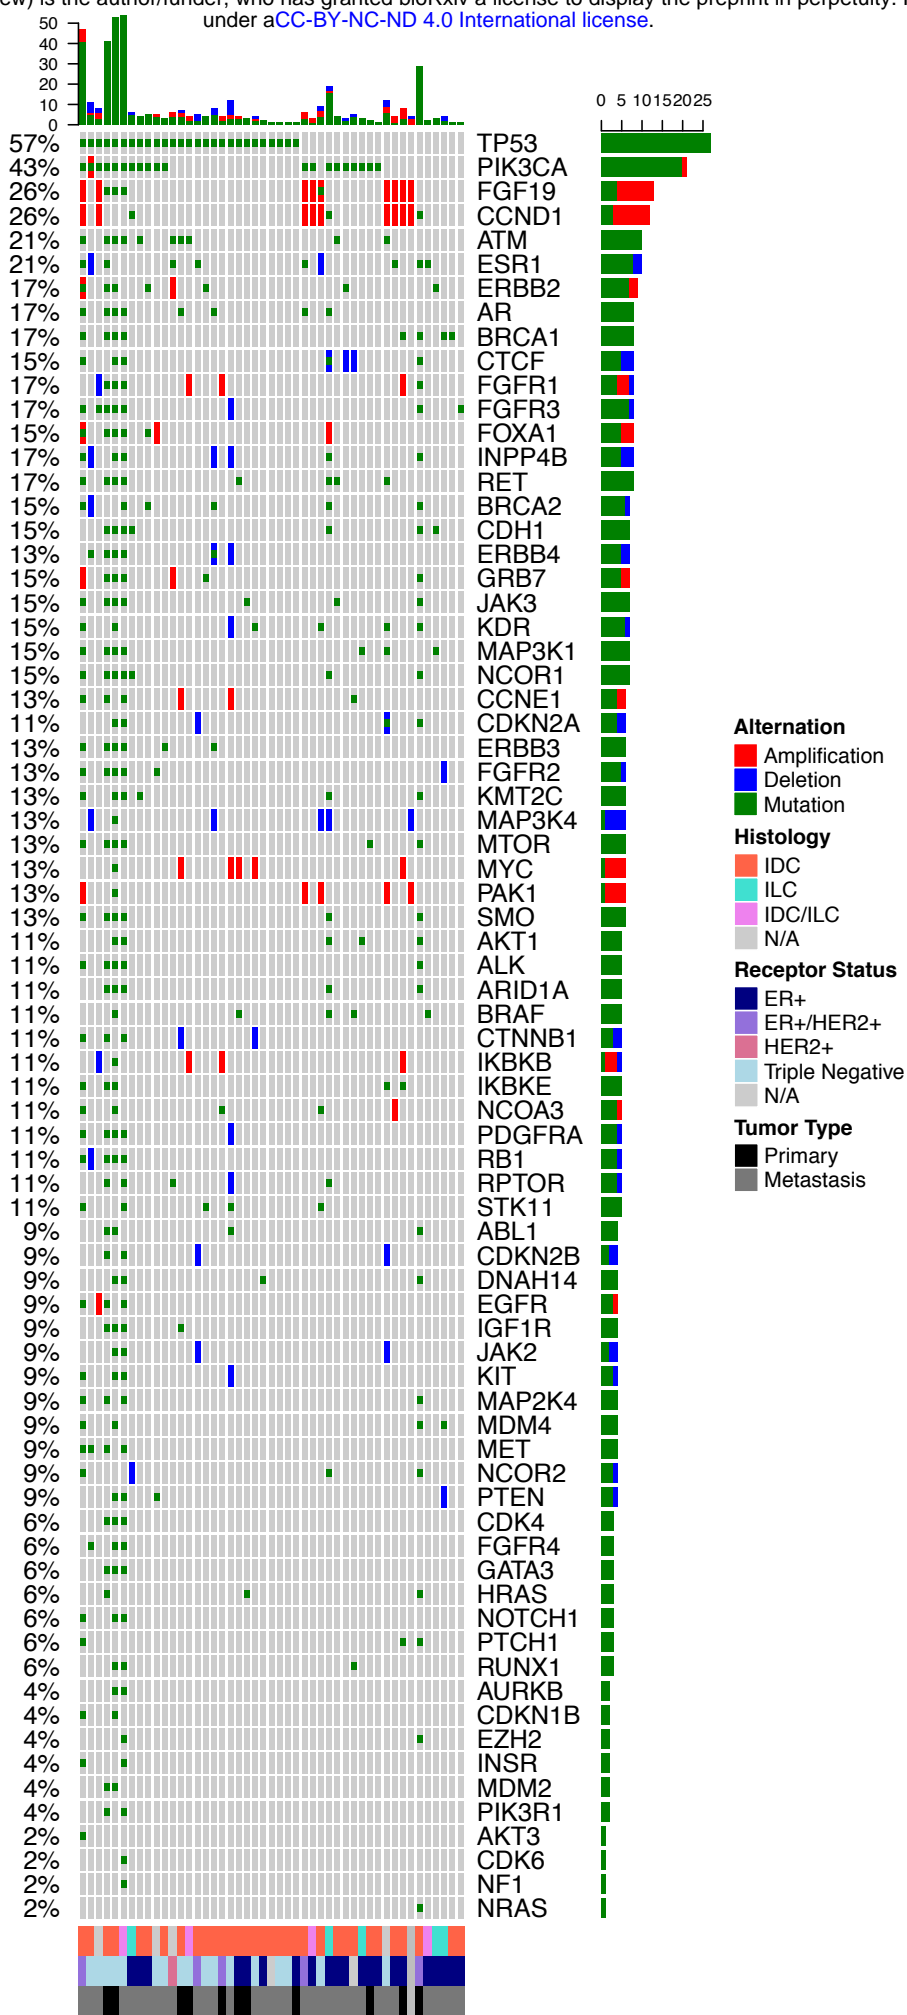

## Figure 2

A

**Level 1:** FDA recognized biomarker predictive of response to an FDA approved drug

**Level 2:** Standard of care biomarker predictive of a response to an FDA approved drug

**Level 3:** Compelling clinical evidence supports the biomarker as being predictive of a response to a drug

**Level 4:** Compelling biological evidence supports the biomarker as being predictive of a response to a drug

B

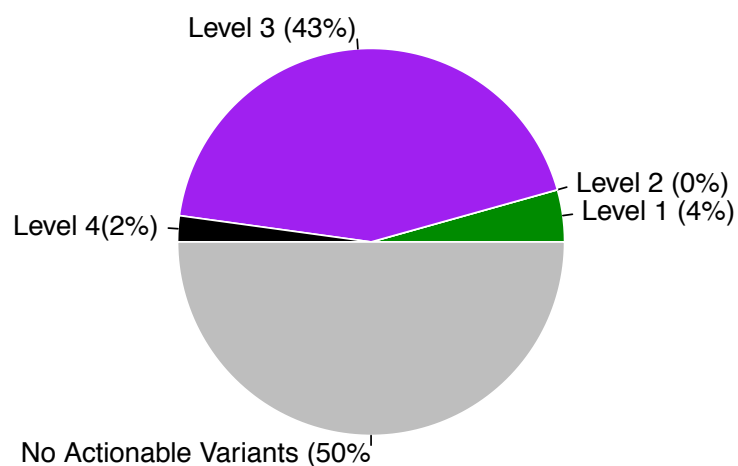

**Figure 3**

**A**

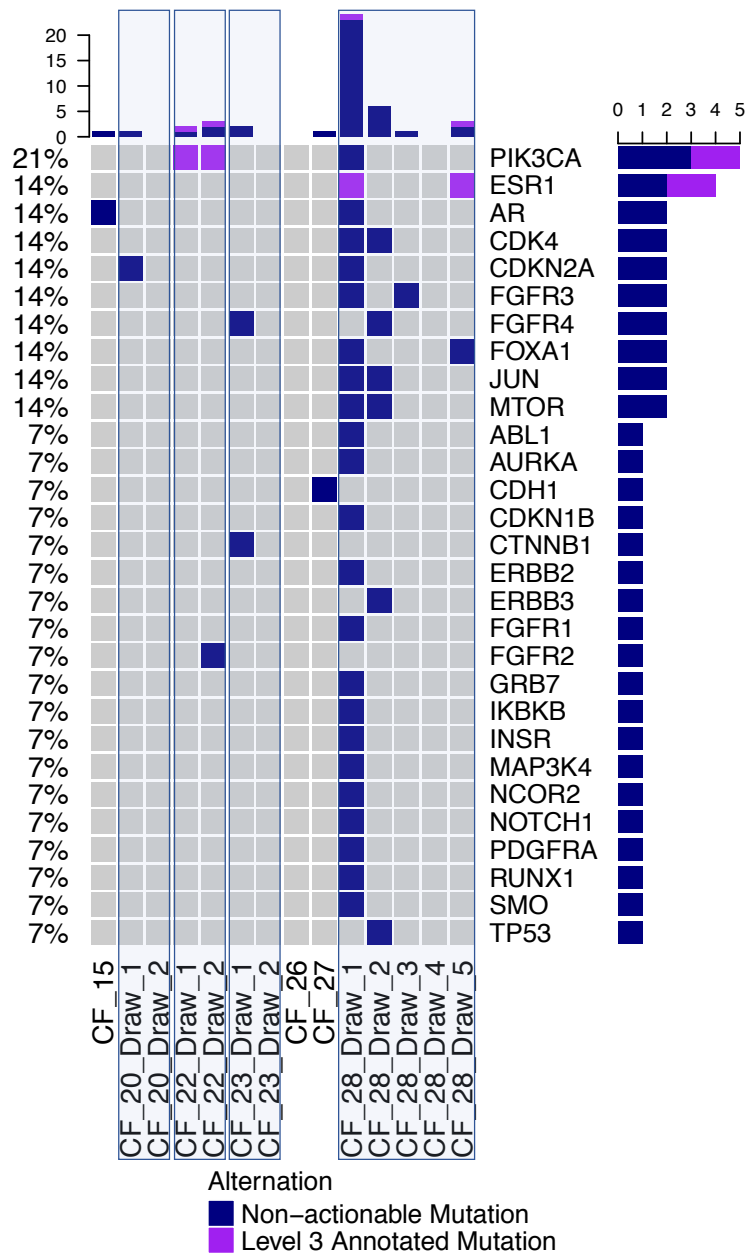

**B**

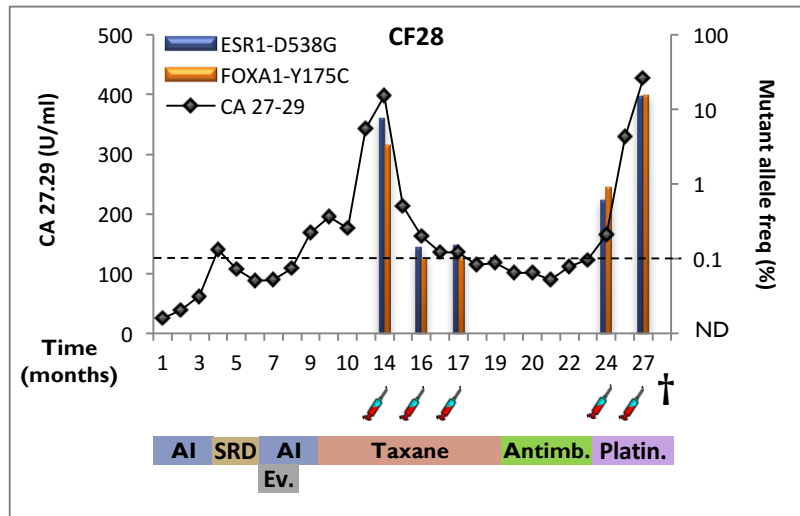

**Table 1: Patient and Specimen Characteristics.**

|                       | <b>Patients with available tumor tissue (n=46)</b> |
|-----------------------|----------------------------------------------------|
| Age                   |                                                    |
| Median age (yrs)      | 45                                                 |
| Range (yrs)           | 31-71                                              |
| Race                  |                                                    |
| White                 | 45 (97.8%)                                         |
| Black                 | 1 (2.2%)                                           |
| Site                  |                                                    |
| Primary               | 10 (21.7%)                                         |
| Metastatic            | 36 (78.3%)                                         |
| Stage (Dx)            |                                                    |
| I                     | 10 (21.7%)                                         |
| II                    | 8 (17.4%)                                          |
| III                   | 13 (28.3%)                                         |
| IV                    | 4 (8.7%)                                           |
| Unknown               | 11 (23.9%)                                         |
| Hormone-receptor      |                                                    |
| HR + and HER2 –       | 19 (41.3%)                                         |
| HR + and HER2 +       | 5 (10.9%)                                          |
| HR + and HER2 Unknown | 1 (2.2%)                                           |
| HR – and HER2 +       | 1 (2.2%)                                           |
| HR – and HER2 –       | 17 (36.9%)                                         |
| Both Unknown          | 2 (4.3%)                                           |
| Histopathology        |                                                    |
| Ductal                | 34 (73.9%)                                         |
| Lobular               | 5 (10.9%)                                          |
| Mixed                 | 3 (6.5%)                                           |
| Other/Unknown         | 4 (8.7%)                                           |

**Table 2:** 79 Genes incorporated in the MammaSeq™ gene panel.

|        |        |            |        |        |
|--------|--------|------------|--------|--------|
| ABL1   | CDK6   | FGFR3      | KDR    | NOTCH1 |
| AKT1   | CDKN1B | FGFR4      | KIT    | NRAS   |
| AKT3   | CDKN2A | FOXA1      | KMT2C  | PAK1   |
| ALK    | CDKN2B | GATA3      | KRAS*  | PDGFRA |
| AR     | CTCF   | GRB7       | MAP2K4 | PIK3CA |
| ARID1A | CTNNB1 | HIST2H2BE* | MAP3K1 | PIK3R1 |
| ATM    | DNAH14 | HRAS*      | MAP3K4 | PTCH1  |
| AURKA  | EGFR   | IDH1*      | MDM2   | PTEN   |
| AURKB  | ERBB2  | IGF1R      | MDM4   | RB1    |
| BRAF   | ERBB3  | IKBKB      | MET    | RET    |
| BRCA1  | ERBB4  | IKBKE      | MTOR   | RPTOR  |
| BRCA2  | ESR1   | INPP4B     | MYC    | RUNX1  |
| CCND1  | EZH2*  | INSR       | NCOA3  | SMO    |
| CCNE1  | FGF19  | JAK2       | NCOR1  | STK11  |
| CDH1   | FGFR1  | JAK3       | NCOR2  | TP53   |
| CDK4   | FGFR2  | JUN*       | NF1    |        |

\* denotes genes with less than 3 amplicons, for which copy number changes were not reported

**Table 3:** Identified variants in annotated in OncoKB with corresponding targeted therapeutics.

| Sample ID    | Gene   | Protein Sequence Change | Allele Frequency | Level | Drugs                                                                                                                                           |                             |
|--------------|--------|-------------------------|------------------|-------|-------------------------------------------------------------------------------------------------------------------------------------------------|-----------------------------|
| MET_03       | ERBB2  | Amplification           | -                | 1     | Lapatinib + Trastuzumab, Pertuzumab + Trastuzumab, Ado-trastuzumab emtansine, Lapatinib, Trastuzumab                                            |                             |
| MET_33       | ERBB2  | Amplification           | -                | 1     |                                                                                                                                                 |                             |
| MET_39       | AKT1   | E17K                    | 0.25             | 3     | AZD5363                                                                                                                                         |                             |
| MET_18       | ERBB2  | I654V                   | 0.122222         | 3     | Neratinib                                                                                                                                       |                             |
| MET_32       | ERBB2  | I654V                   | 0.461731         | 3     |                                                                                                                                                 |                             |
| MET_49       | ERBB2  | I654V                   | 0.495495         | 3     |                                                                                                                                                 |                             |
| MET_07       | ESR1   | D538G                   | 0.477717         | 3     | AZD9496, Fulvestrant                                                                                                                            |                             |
| MET_21       | ESR1   | D538G                   | 0.335884         | 3     |                                                                                                                                                 |                             |
| MET_28       | ESR1   | D538G                   | 0.454271         | 3     |                                                                                                                                                 |                             |
| MET_27       | ESR1   | Y537S                   | 0.376441         | 3     |                                                                                                                                                 |                             |
| MET_22       | PIK3CA | E453K                   | 0.444722         | 3     | Buparlisib, Serabelisib, Alpelisib + Fulvestrant, Copanlisib, GDC-0077, Alpelisib, Taselisib + Fulvestrant, Buparlisib + Fulvestrant, Taselisib |                             |
| MET_10       | PIK3CA | E542K                   | 0.106212         | 3     |                                                                                                                                                 |                             |
| MET_21       | PIK3CA | E542K                   | 0.501912         | 3     |                                                                                                                                                 |                             |
| MET_41       | PIK3CA | E542K                   | 0.073183         | 3     |                                                                                                                                                 |                             |
| MET_49       | PIK3CA | E542K                   | 0.467702         | 3     |                                                                                                                                                 |                             |
| MET_08       | PIK3CA | E545K                   | 0.204327         | 3     |                                                                                                                                                 |                             |
| MET_34       | PIK3CA | E545K                   | 0.0871914        | 3     |                                                                                                                                                 |                             |
| MET_40       | PIK3CA | E545K                   | 0.844344         | 3     |                                                                                                                                                 |                             |
| MET_25       | PIK3CA | H1047R                  | 0.341171         | 3     |                                                                                                                                                 |                             |
| MET_29       | PIK3CA | H1047R                  | 0.180681         | 3     |                                                                                                                                                 |                             |
| MET_32       | PIK3CA | H1047R                  | 0.2785           | 3     |                                                                                                                                                 |                             |
| MET_33       | PIK3CA | H1047R                  | 0.413998         | 3     |                                                                                                                                                 |                             |
| MET_38       | PIK3CA | H1047R                  | 0.384692         | 3     |                                                                                                                                                 |                             |
| MET_44       | PIK3CA | H1047R                  | 0.60054          | 3     |                                                                                                                                                 |                             |
| MET_06       | PIK3CA | N345K                   | 0.376571         | 3     |                                                                                                                                                 |                             |
| MET_35       | PIK3CA | Q546R                   | 0.435484         | 3     |                                                                                                                                                 |                             |
| PR_26        | BRAF   | G469A                   | 0.52028          | 4     |                                                                                                                                                 | LTT462, BVD-523, KO-994     |
| MET_34       | KRAS   | G12D                    | 0.074            | 4     |                                                                                                                                                 | LY3214996, KO-947, GDC-1014 |
| MET_22       | PTEN   | C136Y                   | 0.756233         | 4     |                                                                                                                                                 | AZD6482 + Alpelisib         |
| MET_01       | PTEN   | R130Q                   | 0.116279         | 4     |                                                                                                                                                 |                             |
| CF_28_Draw_1 | ESR1   | D538G                   | 0.0746562        | 3     | AZD9496, Fulvestrant                                                                                                                            |                             |
| CF_28_Draw_5 | ESR1   | D538G                   | 0.146853         | 3     |                                                                                                                                                 |                             |
| CF_22_Draw_1 | PIK3CA | H1047R                  | 0.320088         | 3     | Buparlisib, Serabelisib, Alpelisib + Fulvestrant, Copanlisib, GDC-0077, Alpelisib, Taselisib + Fulvestrant, Buparlisib + Fulvestrant, Taselisib |                             |
| CF_22_Draw_2 | PIK3CA | H1047R                  | 0.402402         | 3     |                                                                                                                                                 |                             |
